# Supplementary material for: Experiments on patterns of alluvial cover and bedrock erosion in a meandering channel
Source: Copernicus journal article supplement (doi:10.5194/esurf-7-949-2019), 2019-10-09

# Details about the experimental set up

Roberto Fernández, Gary Parker, and Colin P. Stark

# Bathymetry from Czapiga (2013)

This is the experimental alluvial bathymetry  
Used as the basis for the bedrock bed.

The point cloud was processed in MatLab.  
A relation between streamwise location and  
transverse slope was obtained (see slides 3-5).

Using this relation, the skeleton for the bedrock  
bed was computed (see slide 6).

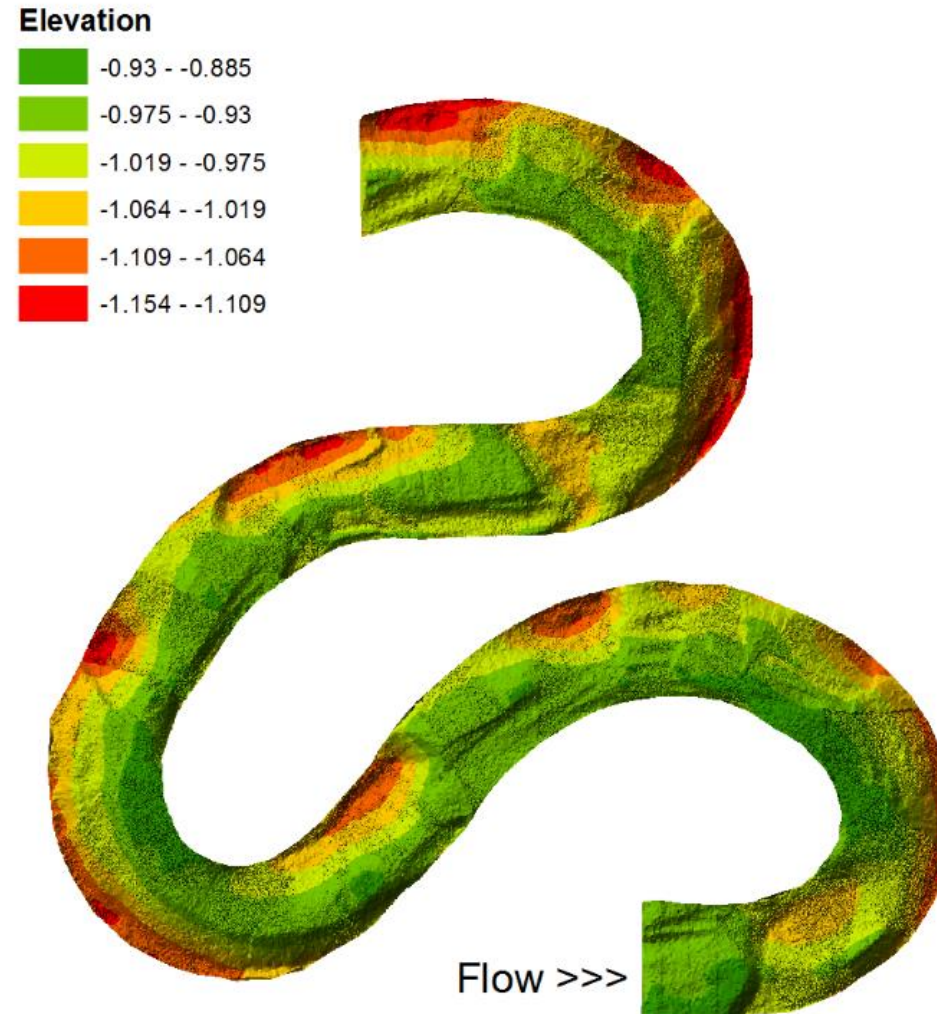

# How do Transverse Slope and Curvature Relate?

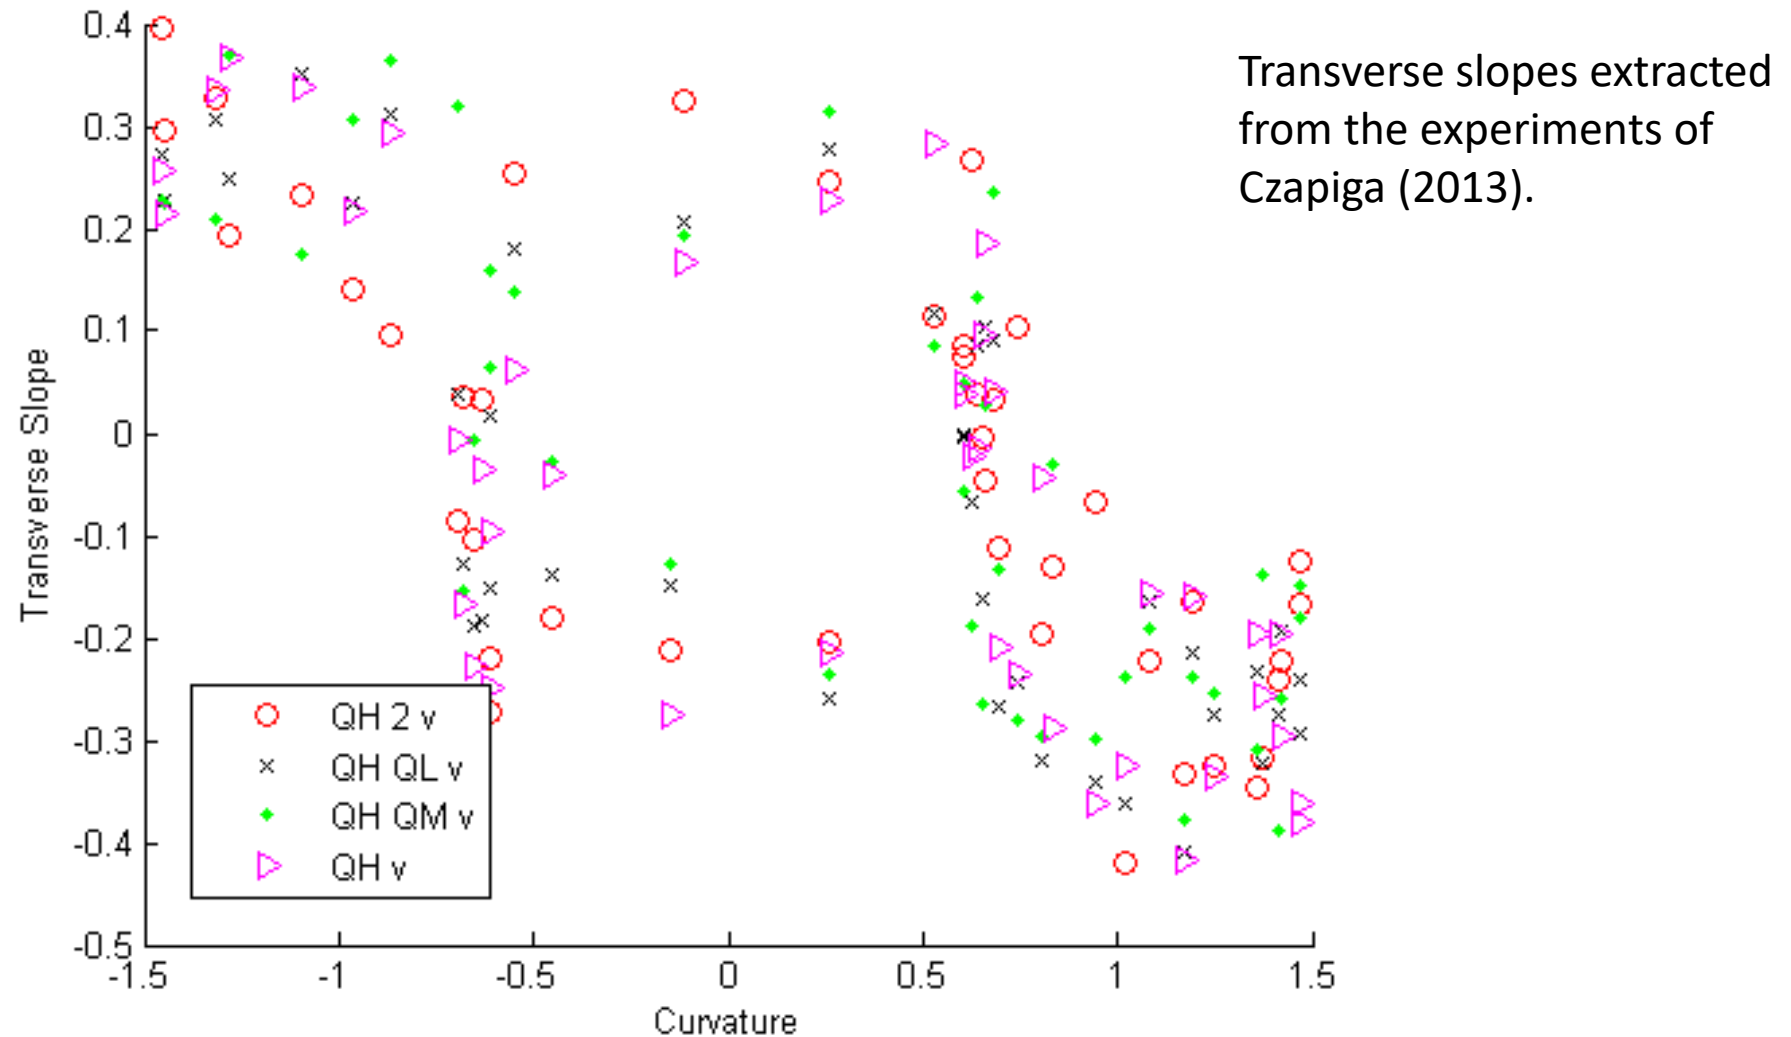

# How do Transverse Slope and Curvature Relate?

Transverse slope vs. station along the Kinoshita flume, and the negative value of curvature also plotted against streamwise station. Data used here corresponds with bathymetry shown in slide 2.

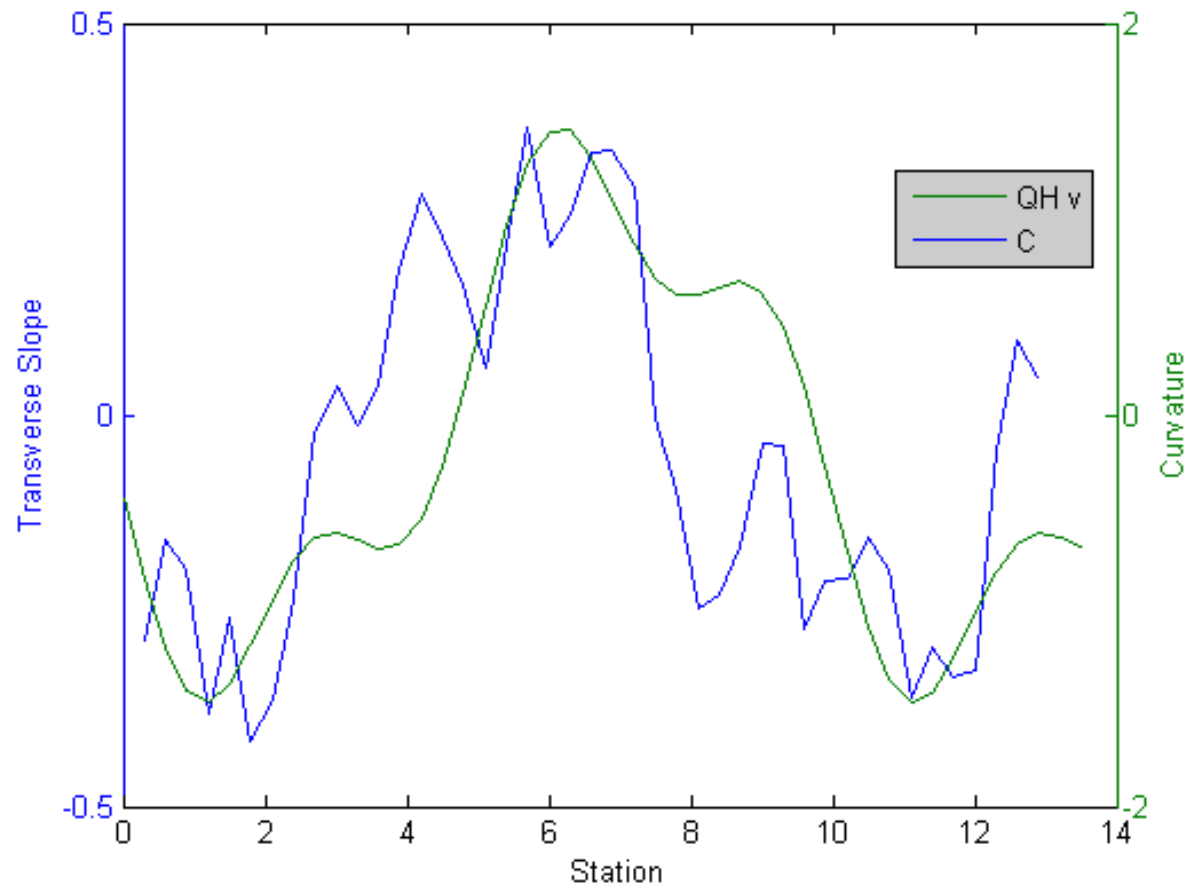

# Relation between transverse slope and streamwise location

$$S_t = a \cdot \sin(b \cdot s - c);$$

|            |                  |
|------------|------------------|
| $a = 0.27$ | $a$ - amplitude  |
| $b = 0.63$ | $b$ - wavelength |
| $c = 1.93$ | $c$ - shifts     |

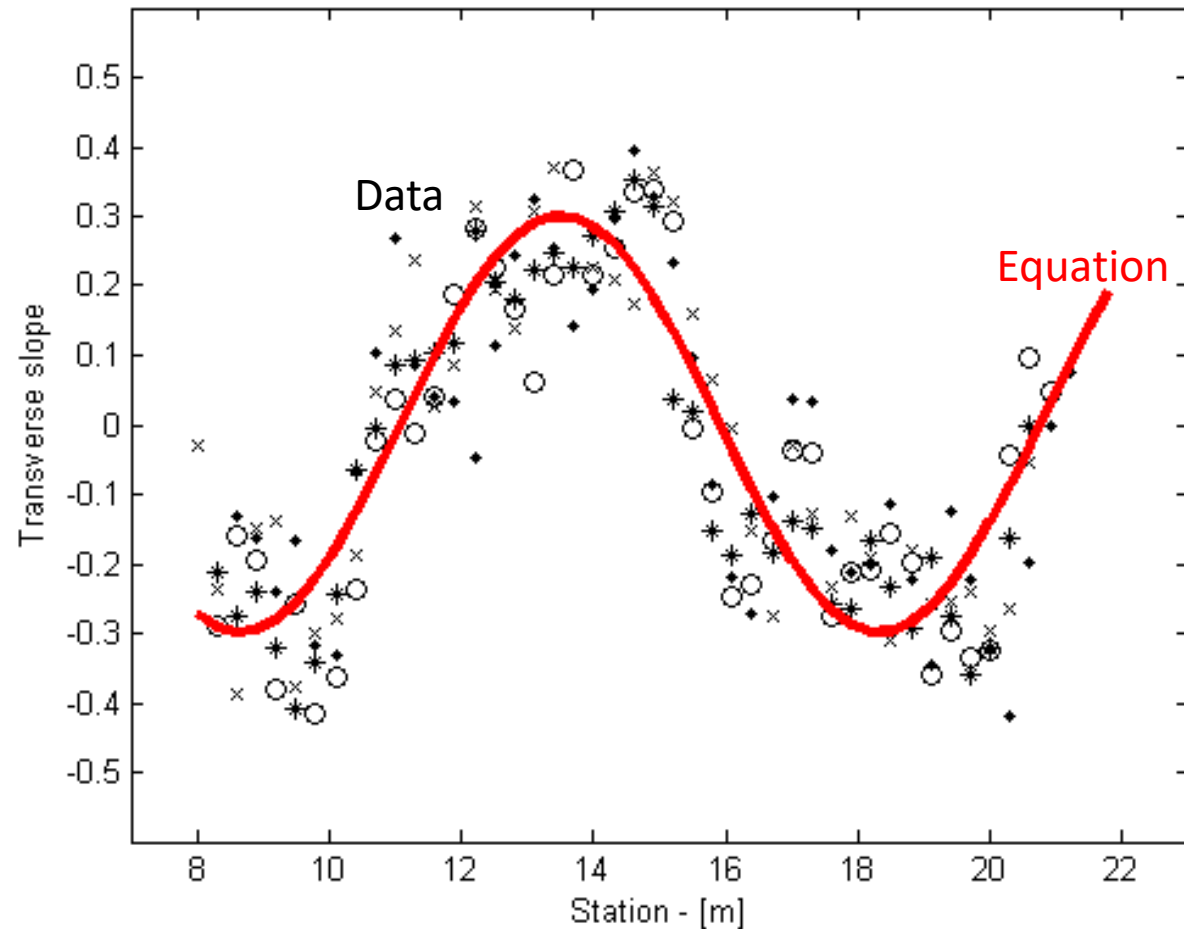

Transverse slope at every meter along the Kinoshita flume.  
Elevations from 0 to 0.3 m. Lateral distances from left wall to right wall; -0.30 to 0.30 (0.0 is the centerline)

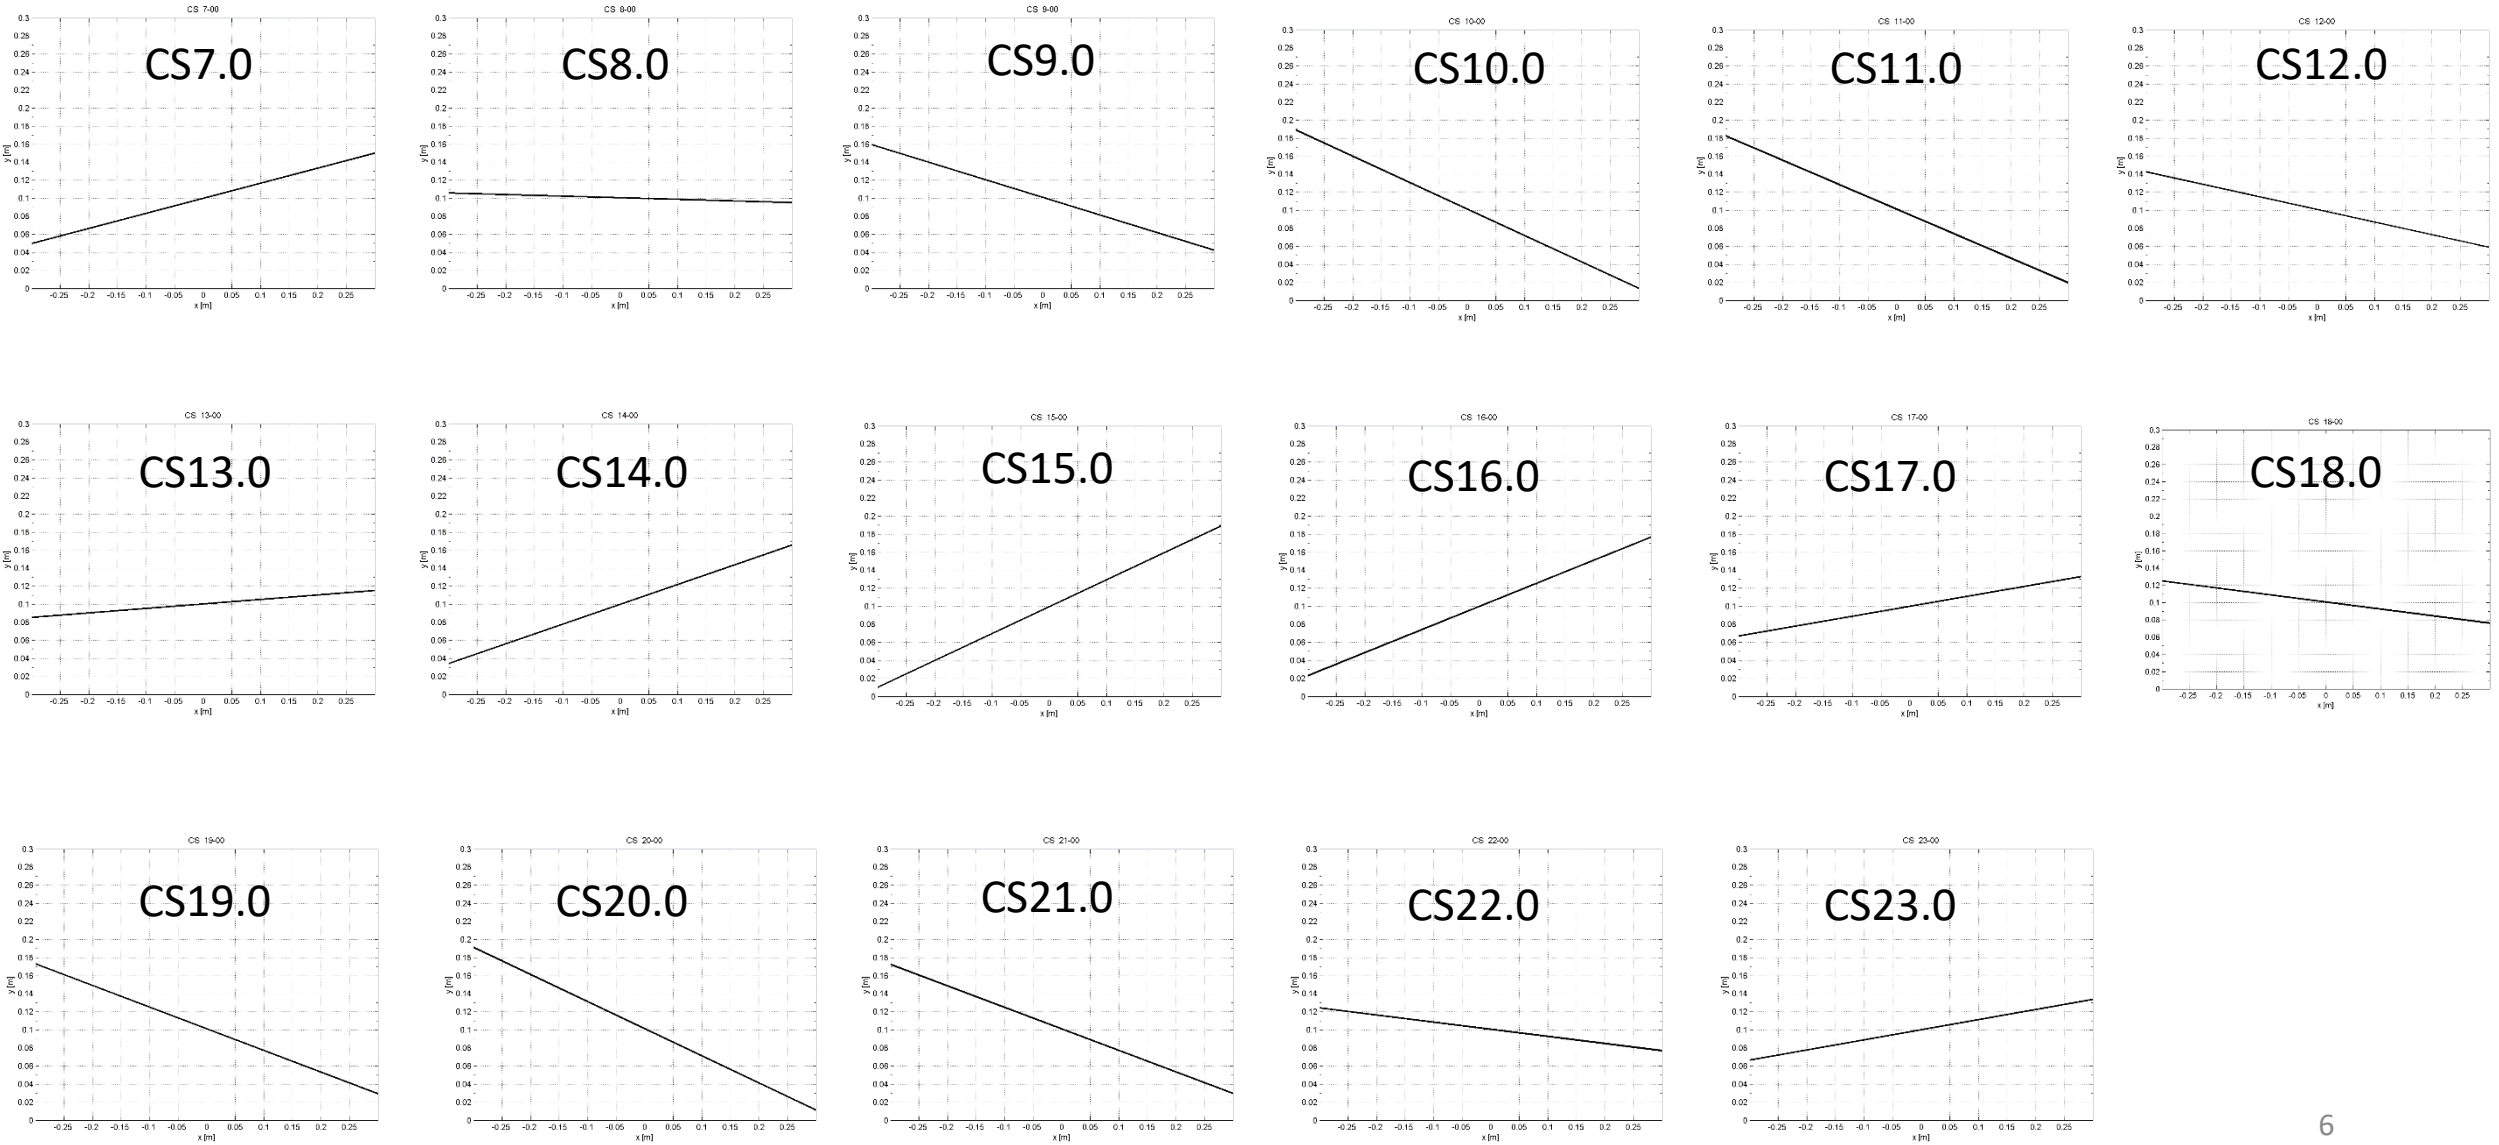

Flume with flat bed

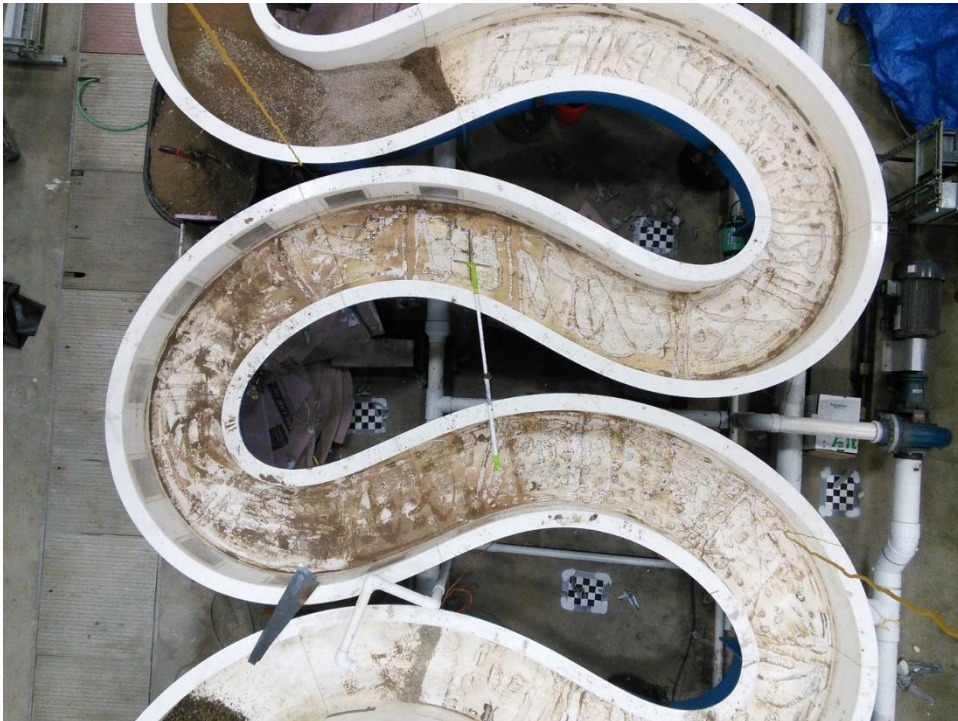

Flume with foam cross sections

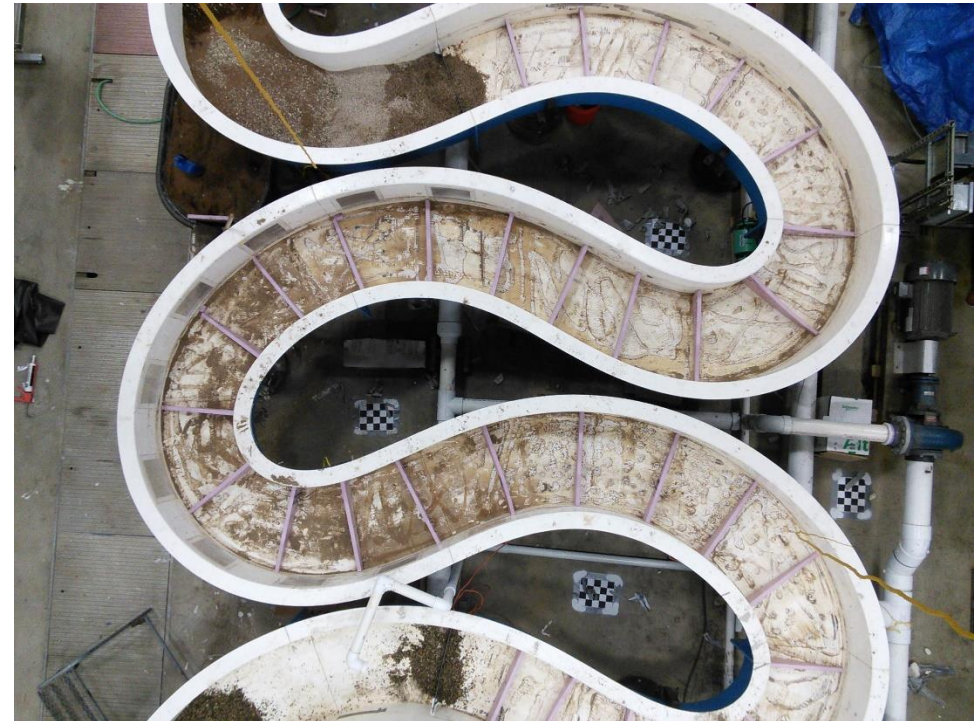

Flume with XSs – Zoomed in

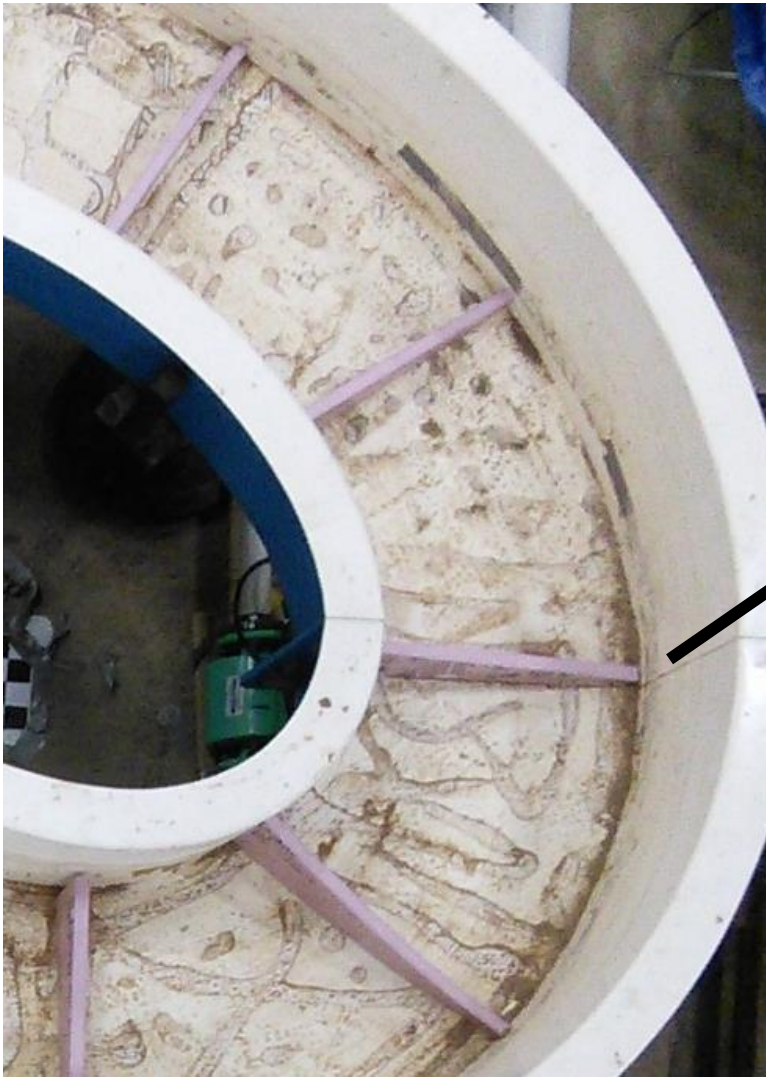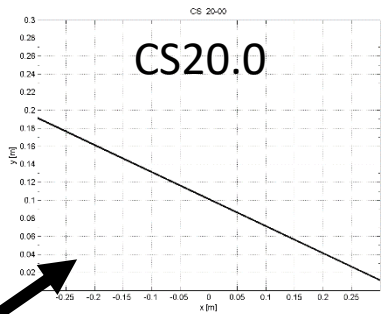

Flume with foam cross sections and gravel filling the pockets between XSs

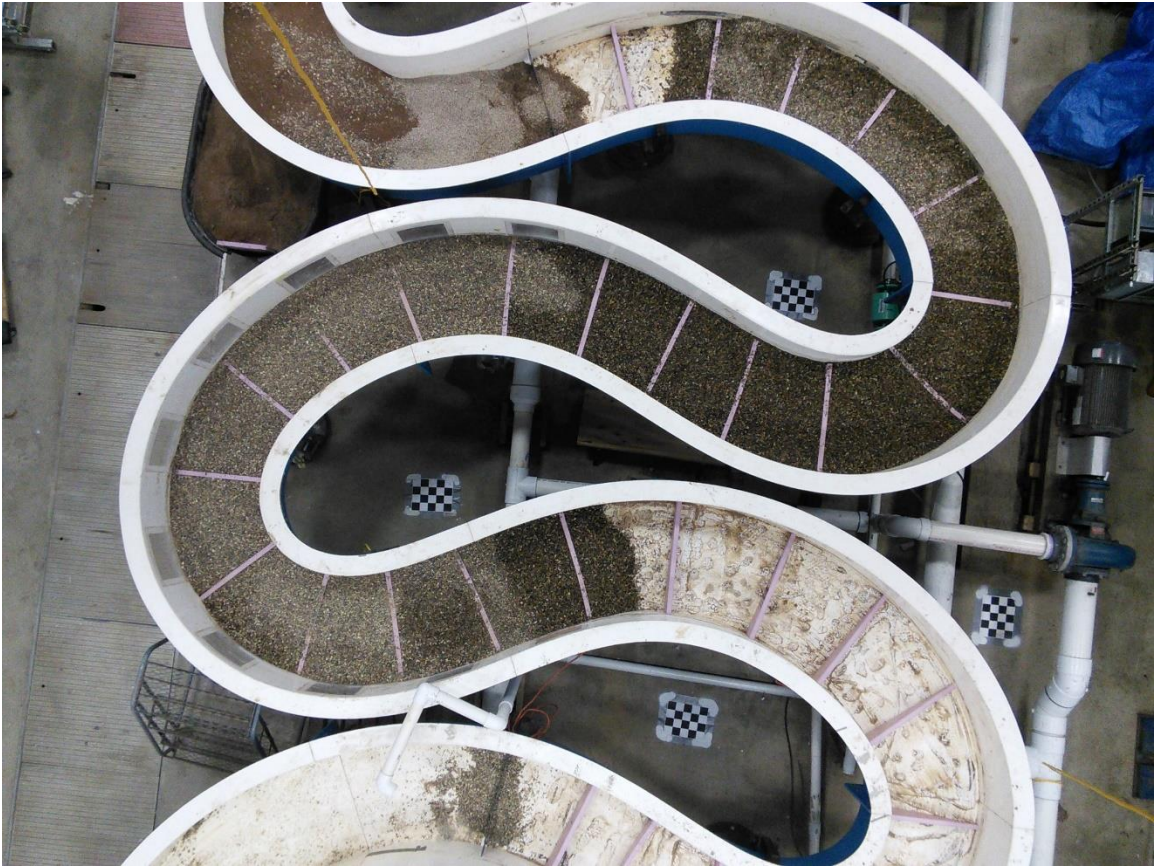

Flume with foam cross sections and pockets  
fully filled with gravel

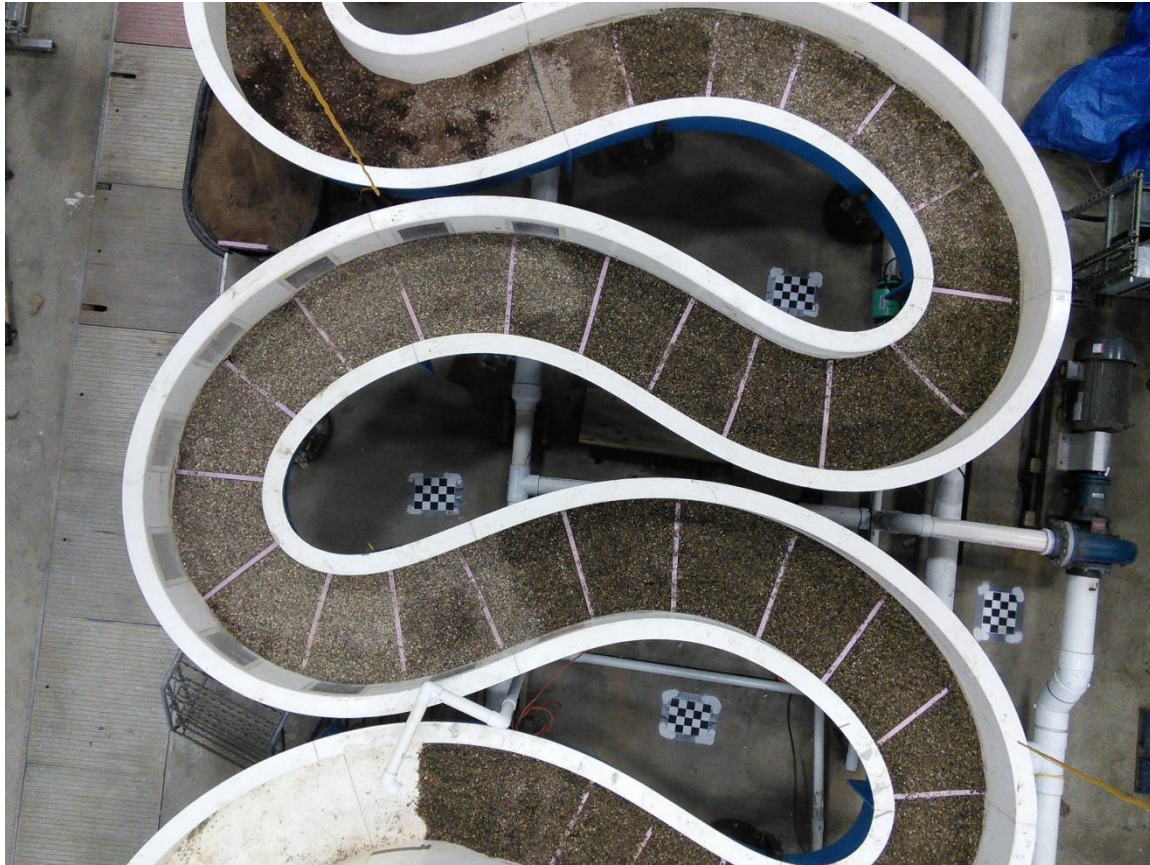

Flume with foam cross sections, gravel and thin  
layer of concrete between CS7 and CS14

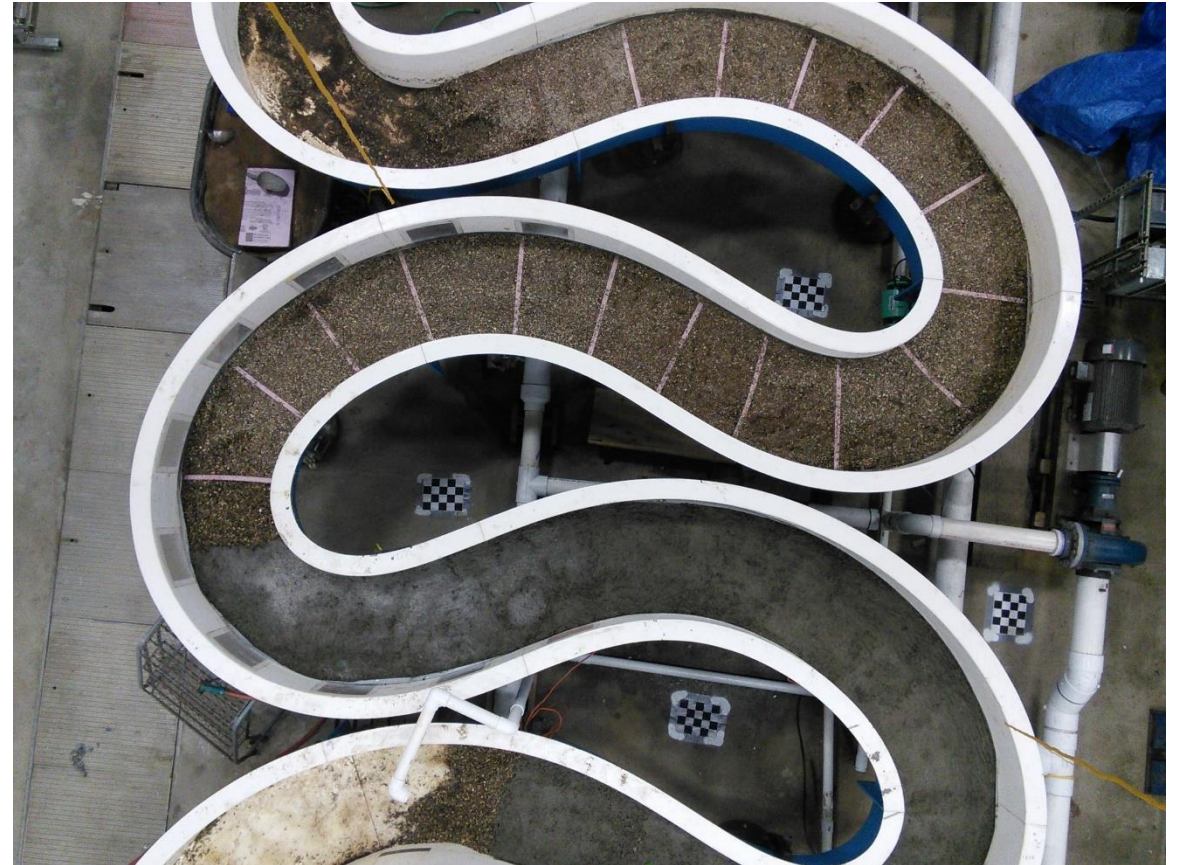

Flume with bedrock bed (all gravel and foam covered with thin layer of concrete).

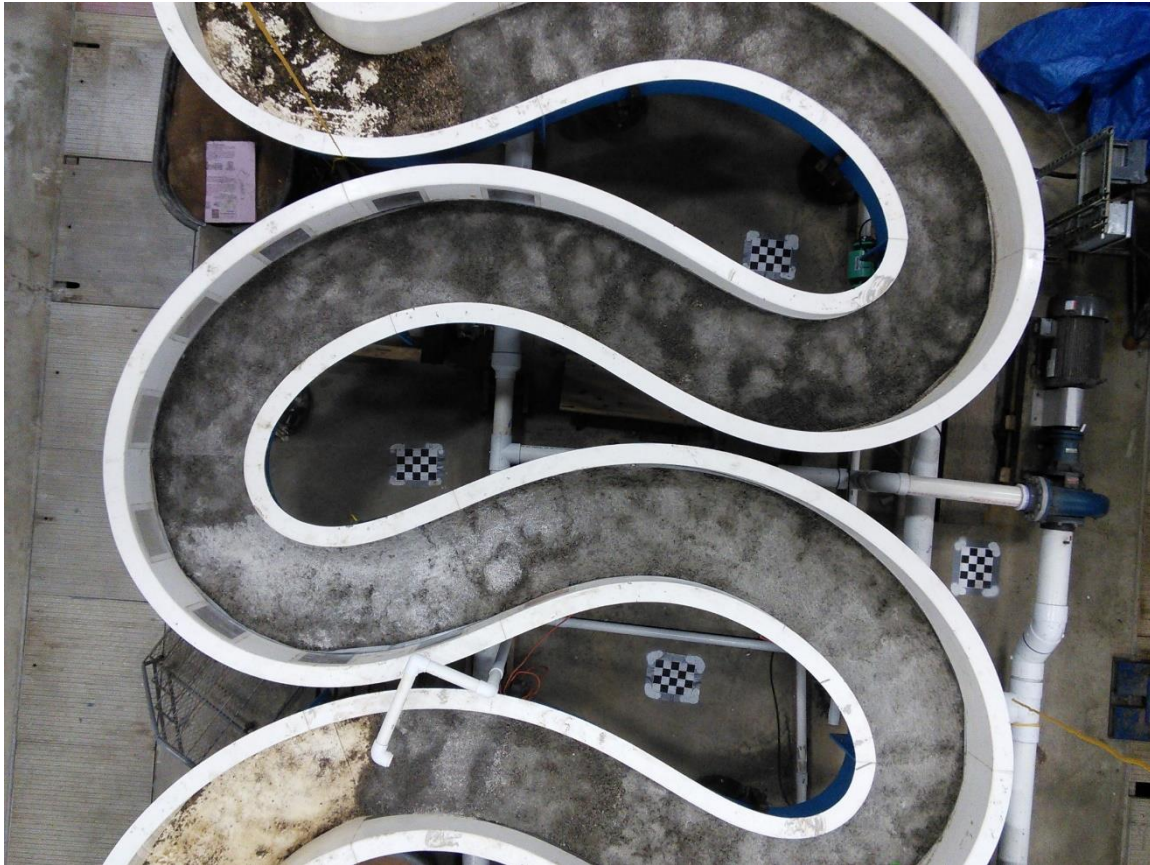

Bedrock bed painted white to increase contrast between bed and alluvium.

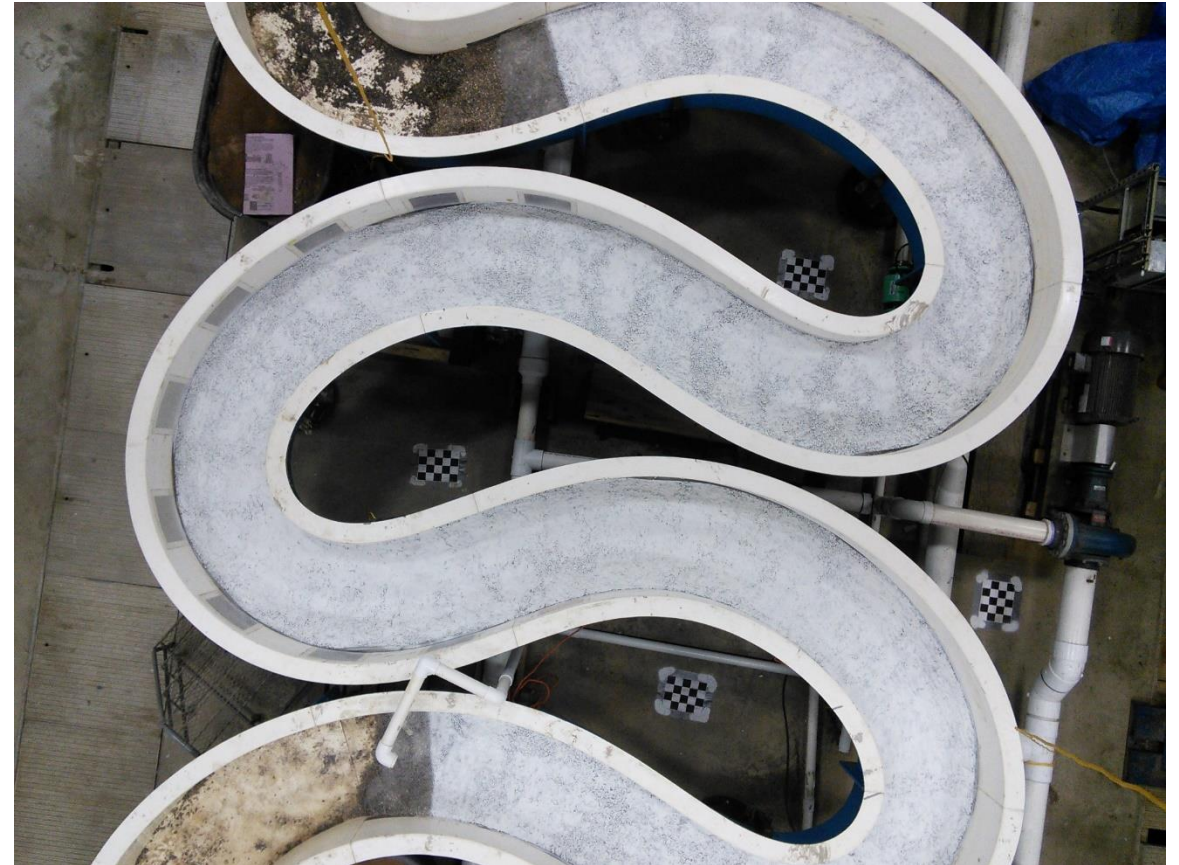

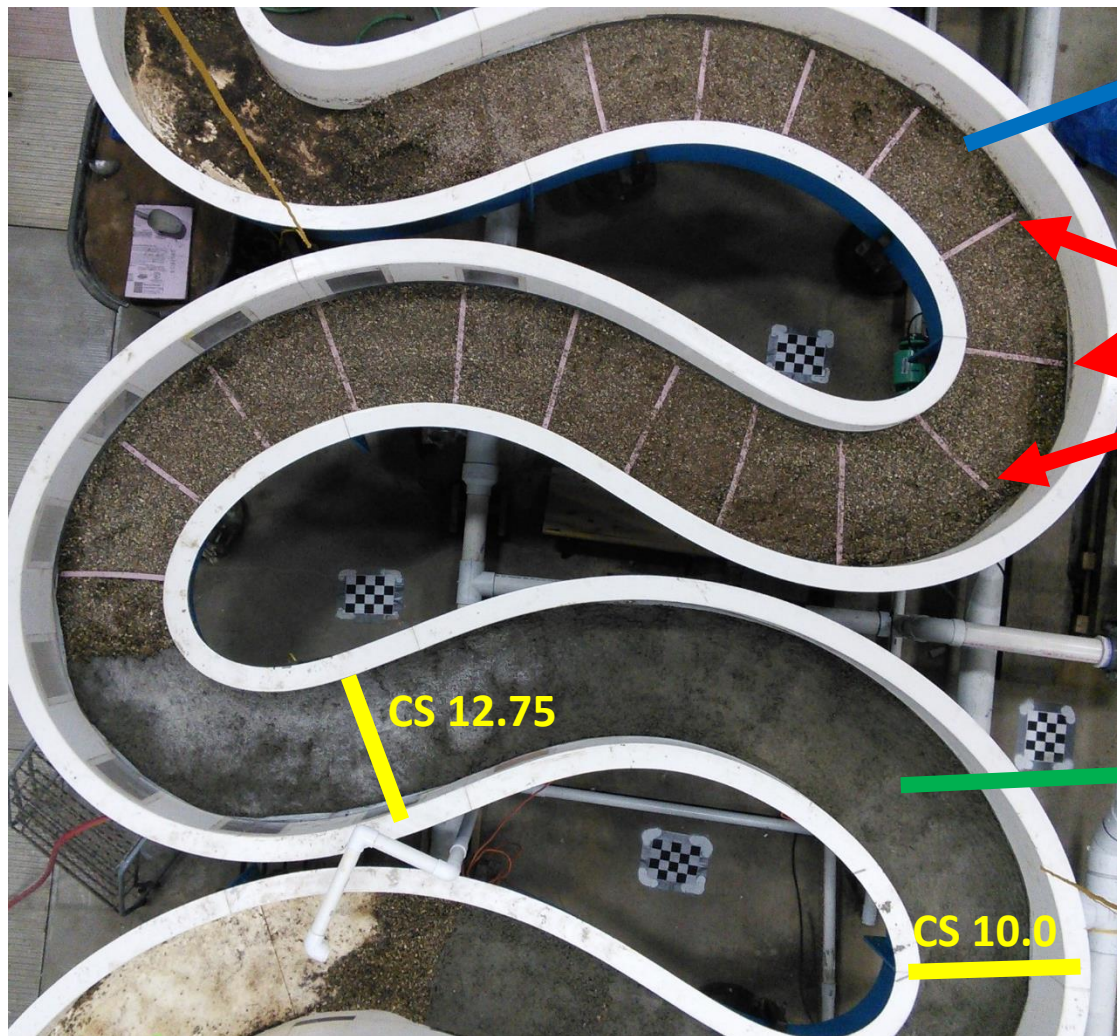

Pea gravel  
between foam

Foam  
Cross Sections

Thin concrete  
layer

CS 12.75

CS 10.0

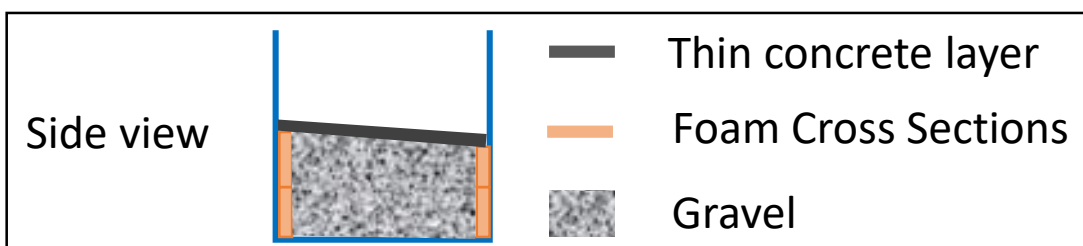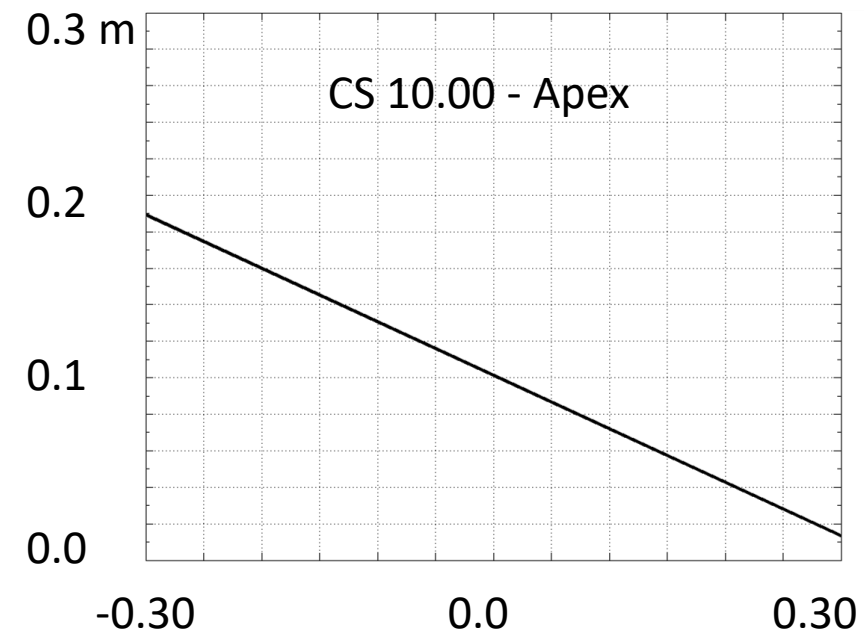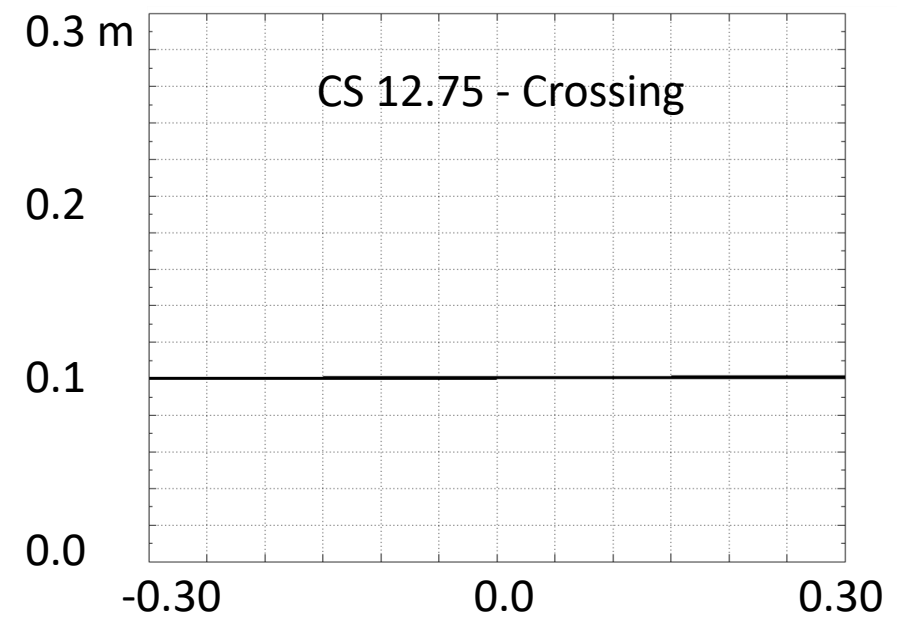

Close-up view of bedrock bed, alluvial cover and eTape at bend.

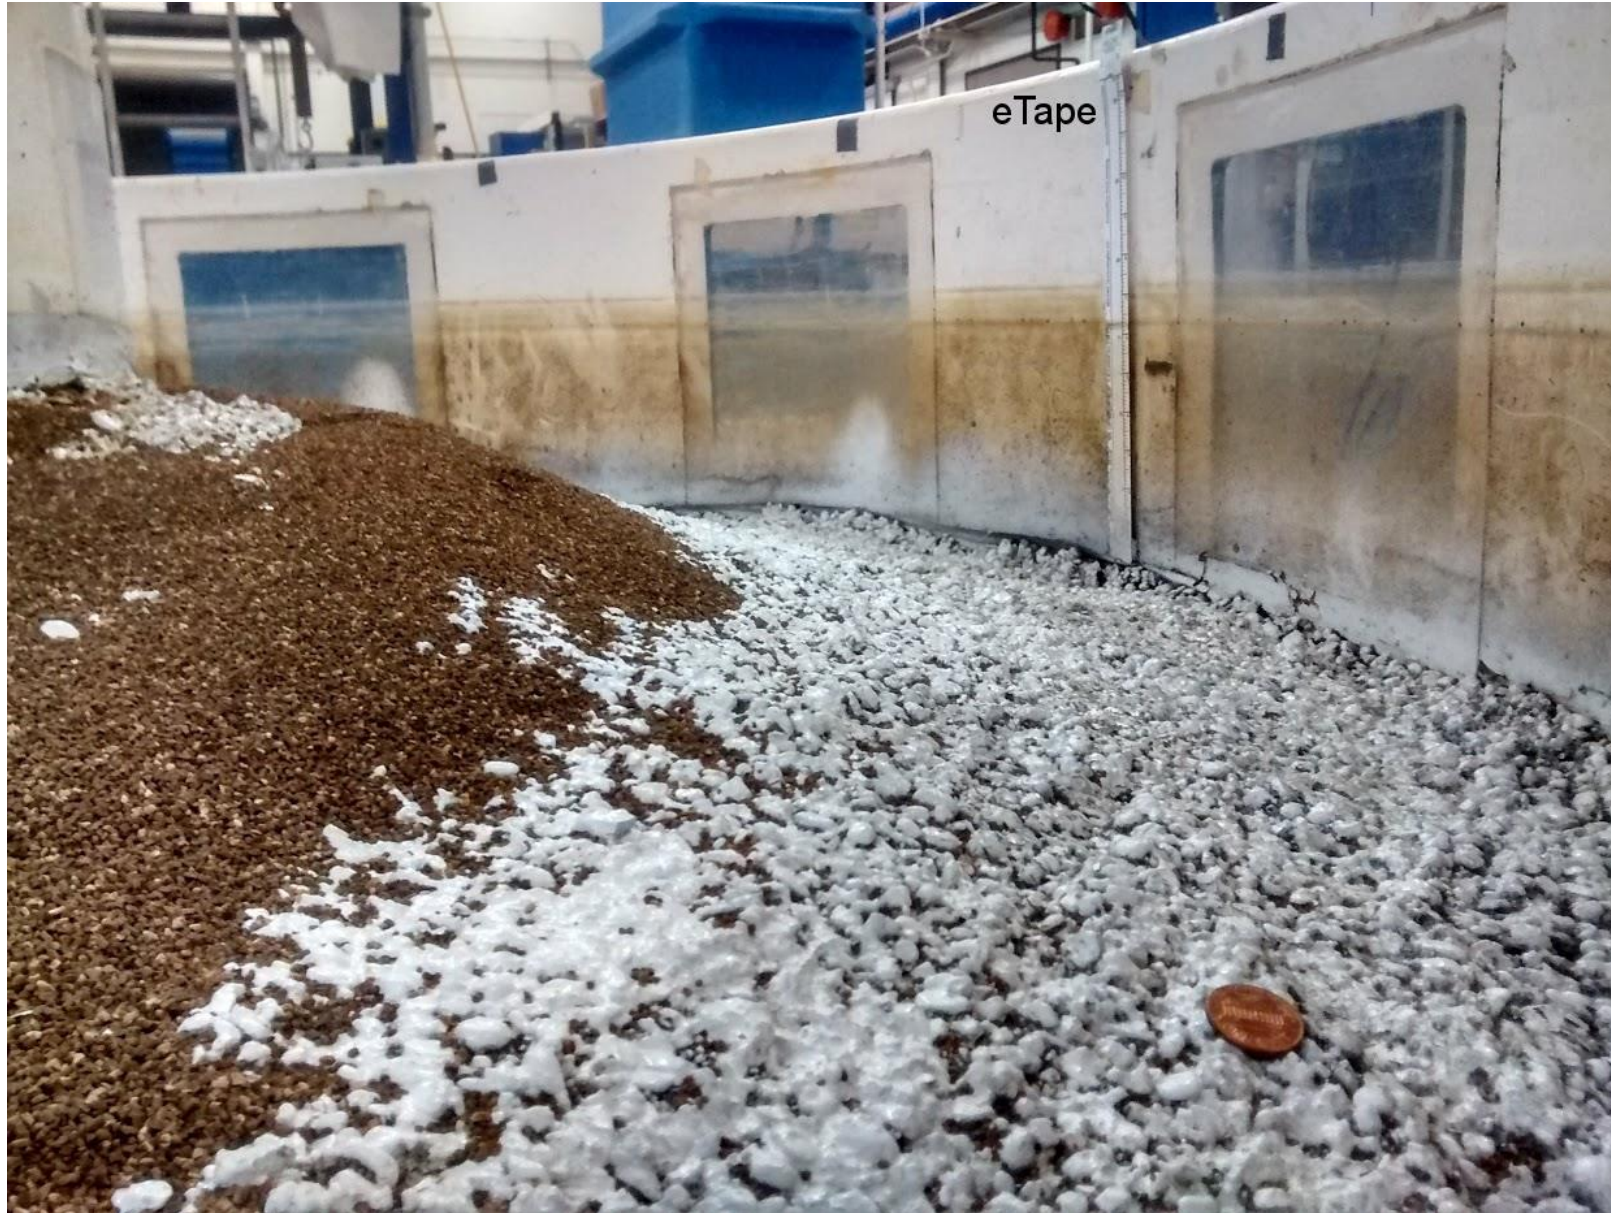

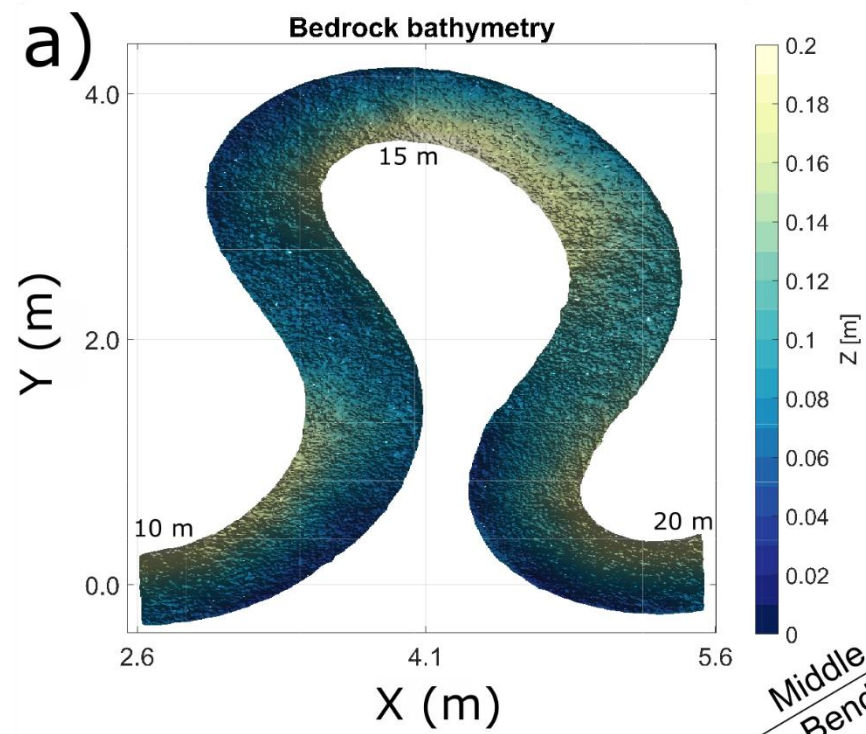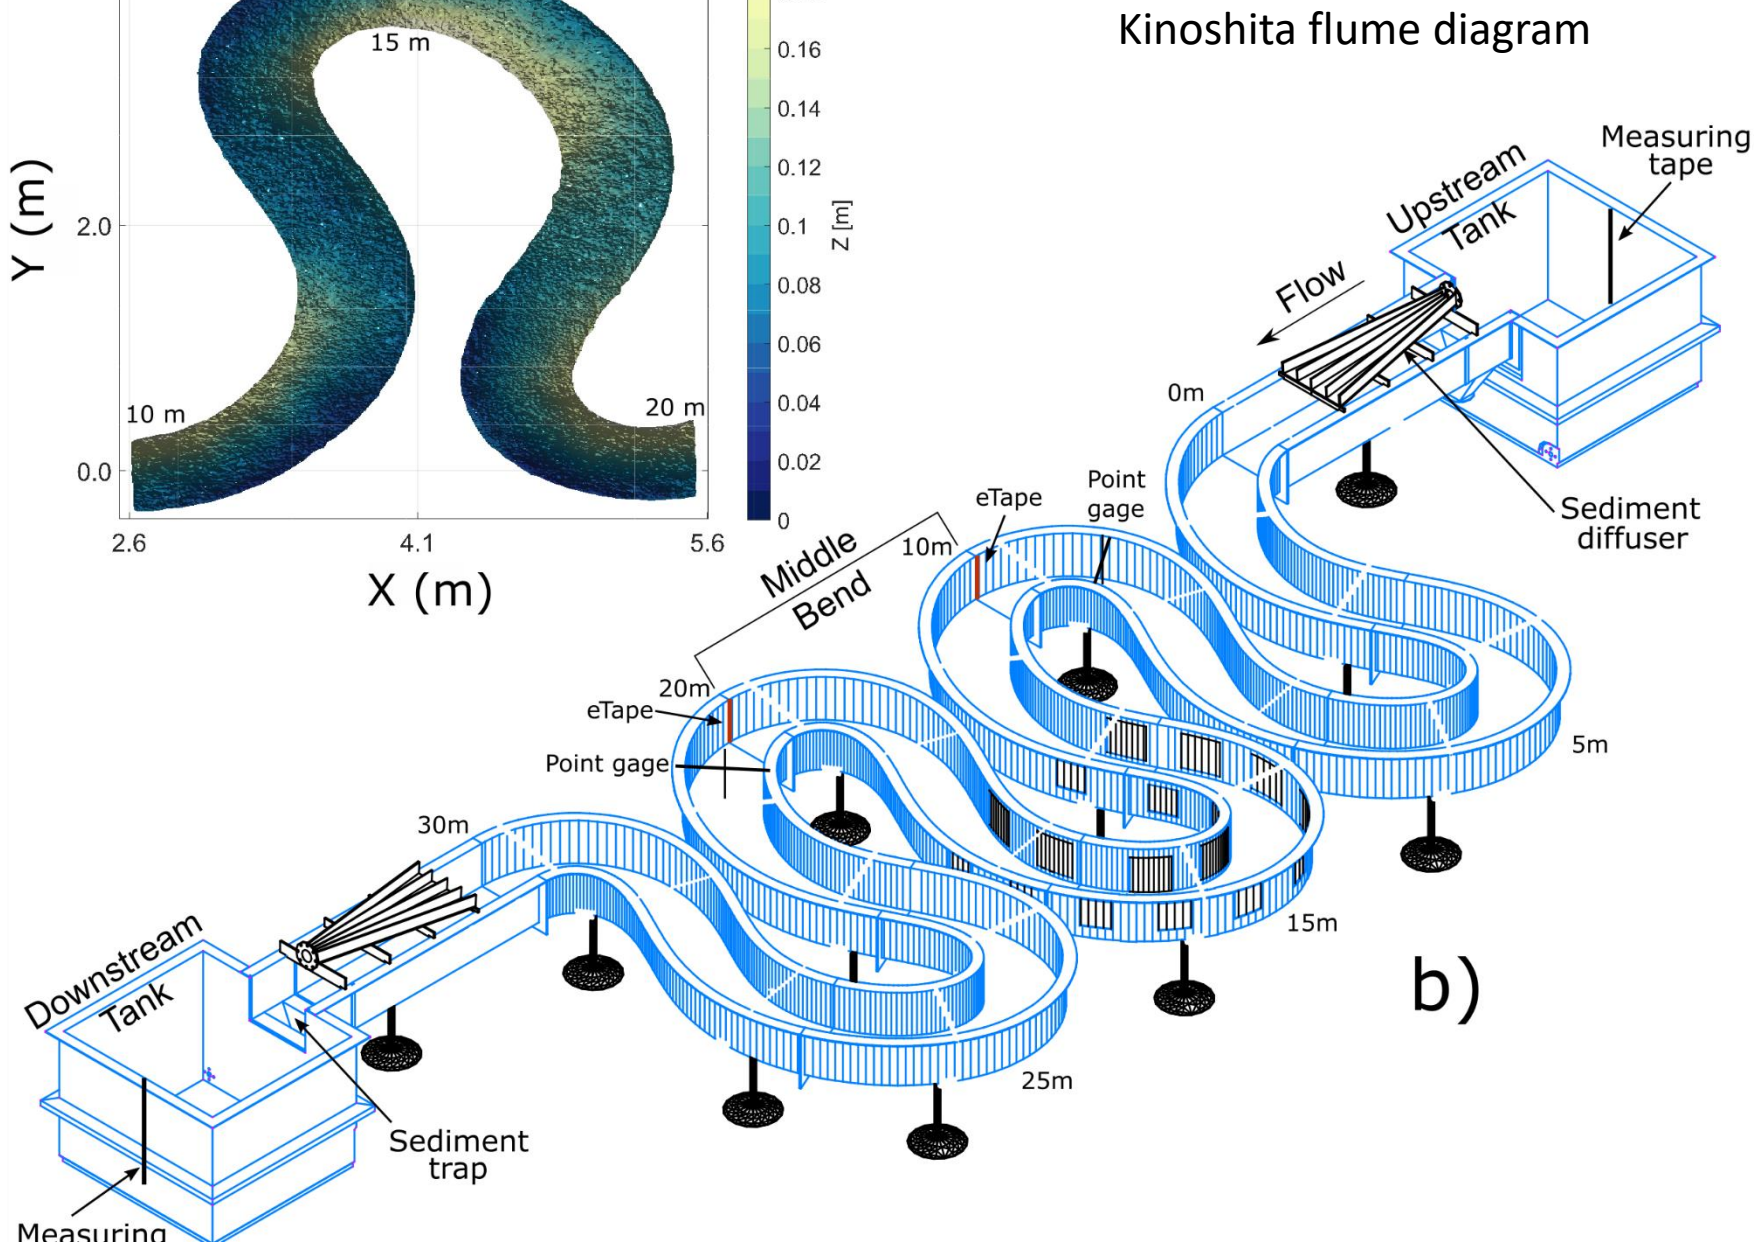

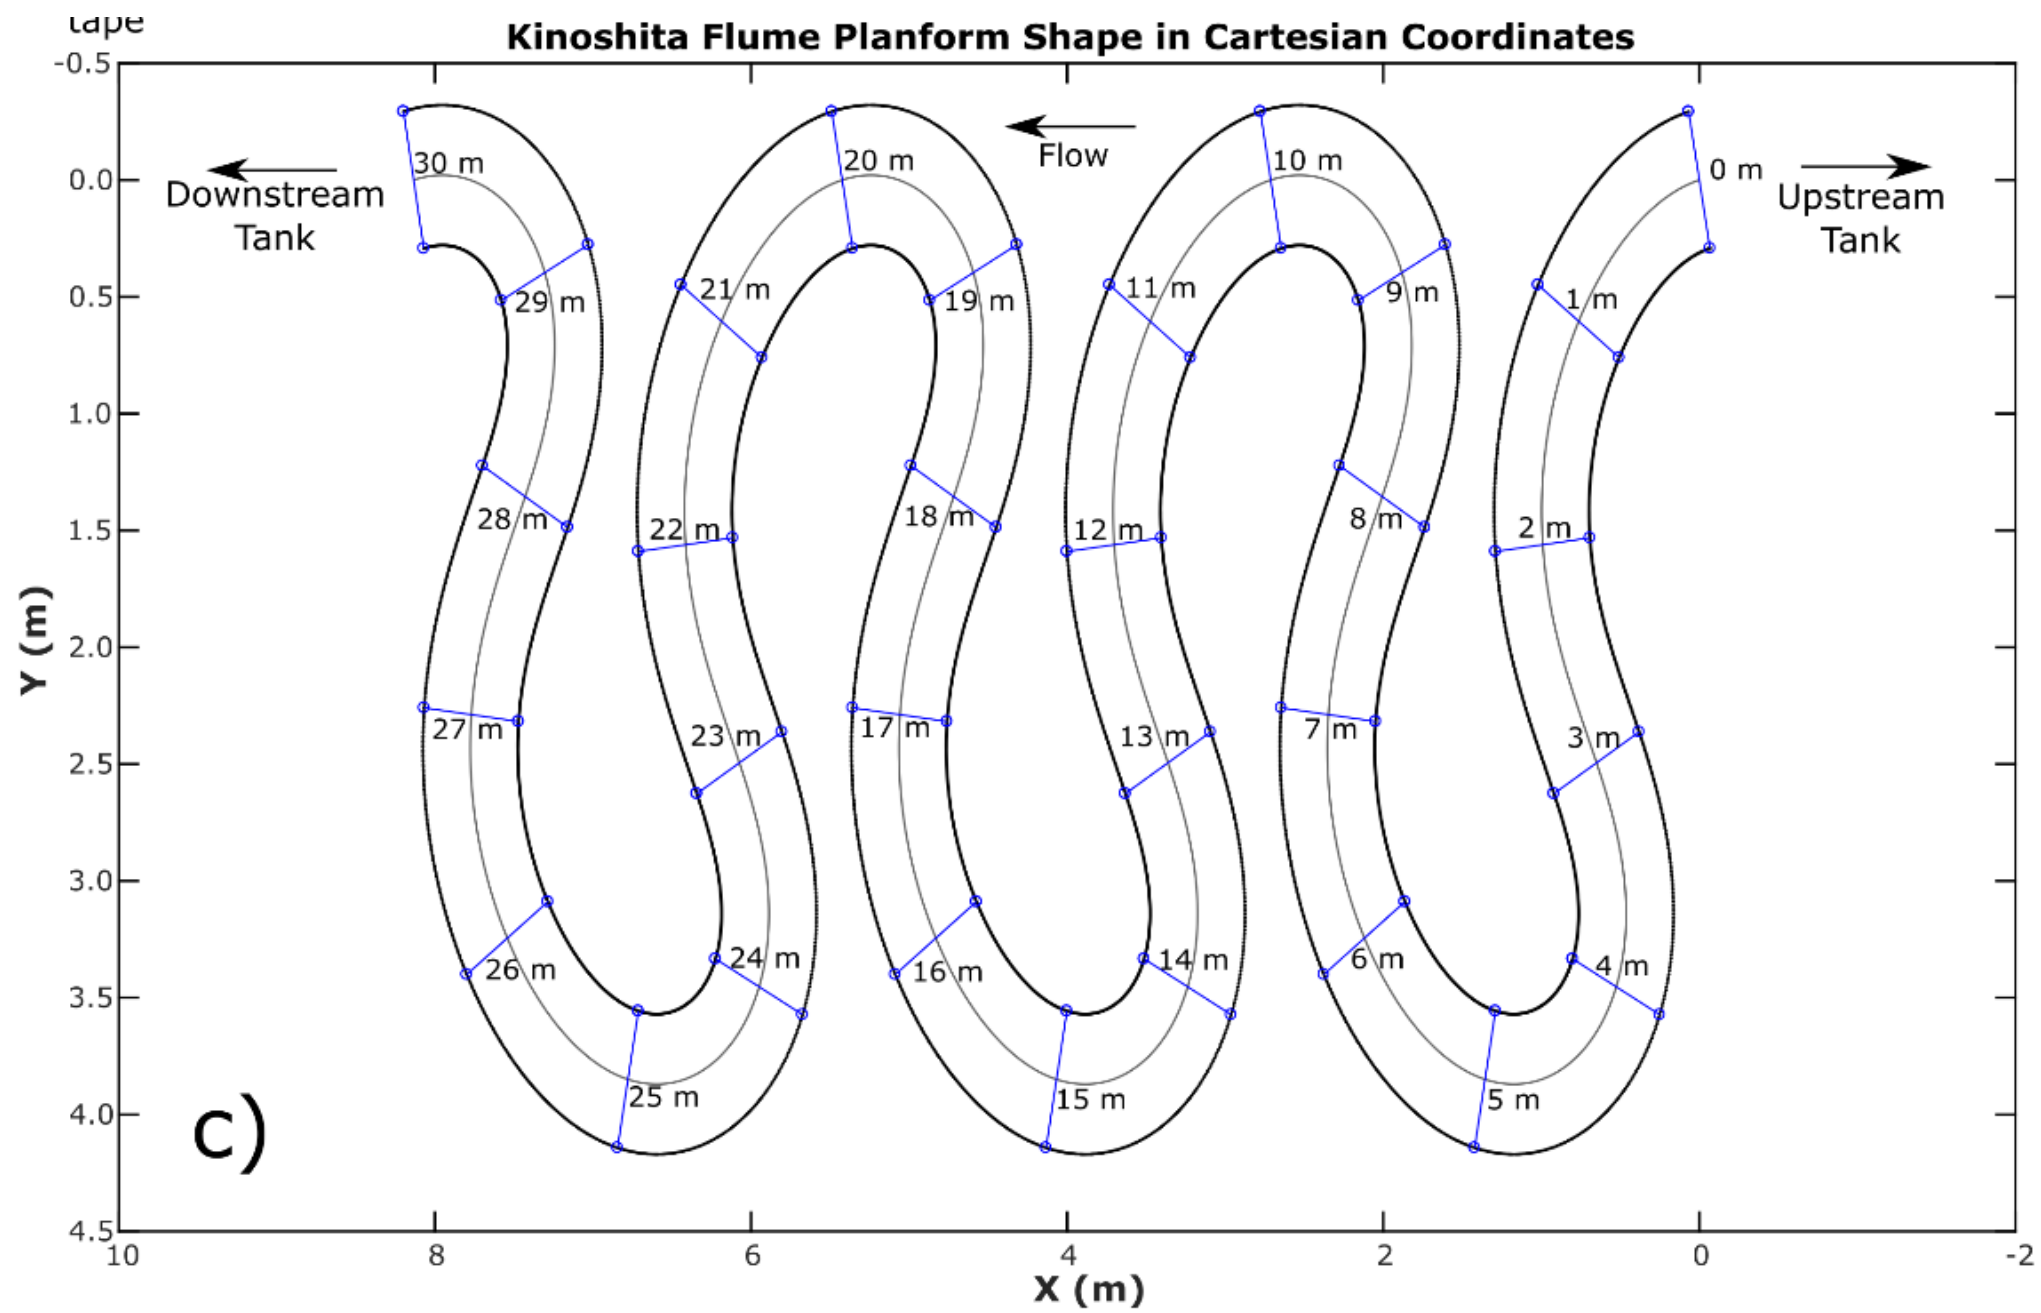

Supplement: Supplementary file 1 [file esurf-7-949-2019-supplement.zip › S3 Details about the experimental set up.pdf]
