# Supplementary material for: Experiments on patterns of alluvial cover and bedrock erosion in a meandering channel
Source: Copernicus journal article supplement (doi:10.5194/esurf-7-949-2019), 2019-10-09
Supplement: Supplementary file 1 [file esurf-7-949-2019-supplement.zip]

Archive with 5 entries (5 files):
- S4 Information about the eTapes.pdf
- S2 Information about the image acquisition and processing.pdf
- esurf-7-949-2019-supplement-title-page.pdf
- S3 Details about the experimental set up.pdf
- S1 Details of the bedrock slab experiment.pdf
