# Supplementary material for: Experiments on patterns of alluvial cover and bedrock erosion in a meandering channel
Source: Copernicus journal article supplement (doi:10.5194/esurf-7-949-2019), 2019-10-09
Supplement: Supplementary file 1 [file esurf-7-949-2019-supplement.zip › esurf-7-949-2019-supplement-title-page.pdf]

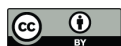

## *Supplement of*

# **Experiments on patterns of alluvial cover and bedrock erosion in a meandering channel**

**Roberto Fernández et al.**

*Correspondence to:* Roberto Fernández (fernan25@illinois.edu)

- esurf-7-949-2019-supplement-title-page.pdf
- S1 Details of the bedrock slab experiment.pdf
- S2 Information about the image acquisition and processing.pdf
- S3 Details about the experimental set up.pdf
- S4 Information about the eTapes.pdf

The copyright of individual parts of the supplement might differ from the CC BY 4.0 License.
